# Supplementary material for: Enhanced photocatalytic CO 2 conversion of a CdS/Co-BDC nanocomposite via Co( ii )/Co( iii ) redox cycling
Source: Royal Society of Chemistry journal article supplement (doi:10.1039/d4ra04842c), 2024-01-01
Supplement: d4ra04842c1.pdf [file d4ra04842c1.pdf]

## Supporting Information

### Enhanced photocatalytic CO<sub>2</sub> conversion of CdS/Co-BDC nanocomposite via Co (II)/Co (III) redox cycling

*<sup>a,c</sup>Ruina Xuan, <sup>a,c</sup>Jieqiong Mo, <sup>a</sup>Jiwen Chen, <sup>a</sup>Yixin Dou, <sup>a</sup>Xiaofang Li, <sup>b</sup>Zhuo jiang, <sup>a</sup>Bo Chai, <sup>a</sup>Chunlei Wang, <sup>a</sup>Deng Ding\*, <sup>a</sup>Juntao Yan\*, <sup>a</sup>Xiaobo Wang\**

<sup>a</sup> College of Chemistry and Environmental Engineering, Wuhan Polytechnic University, Wuhan 430023, China

<sup>b</sup> School of Electrical Engineering and Automation, Wuhan University, Wuhan 430072, China

Corresponding Author: Deng Ding

<sup>c</sup> These authors contributed equally: *Ruina Xuan and Jieqiong Mo.*

Address: College of Chemistry and Environmental Engineering, Wuhan Polytechnic University, Wuhan 430023, China

E-mail: dingdeng@whu.edu.cn

Phone: 0086-15927216471

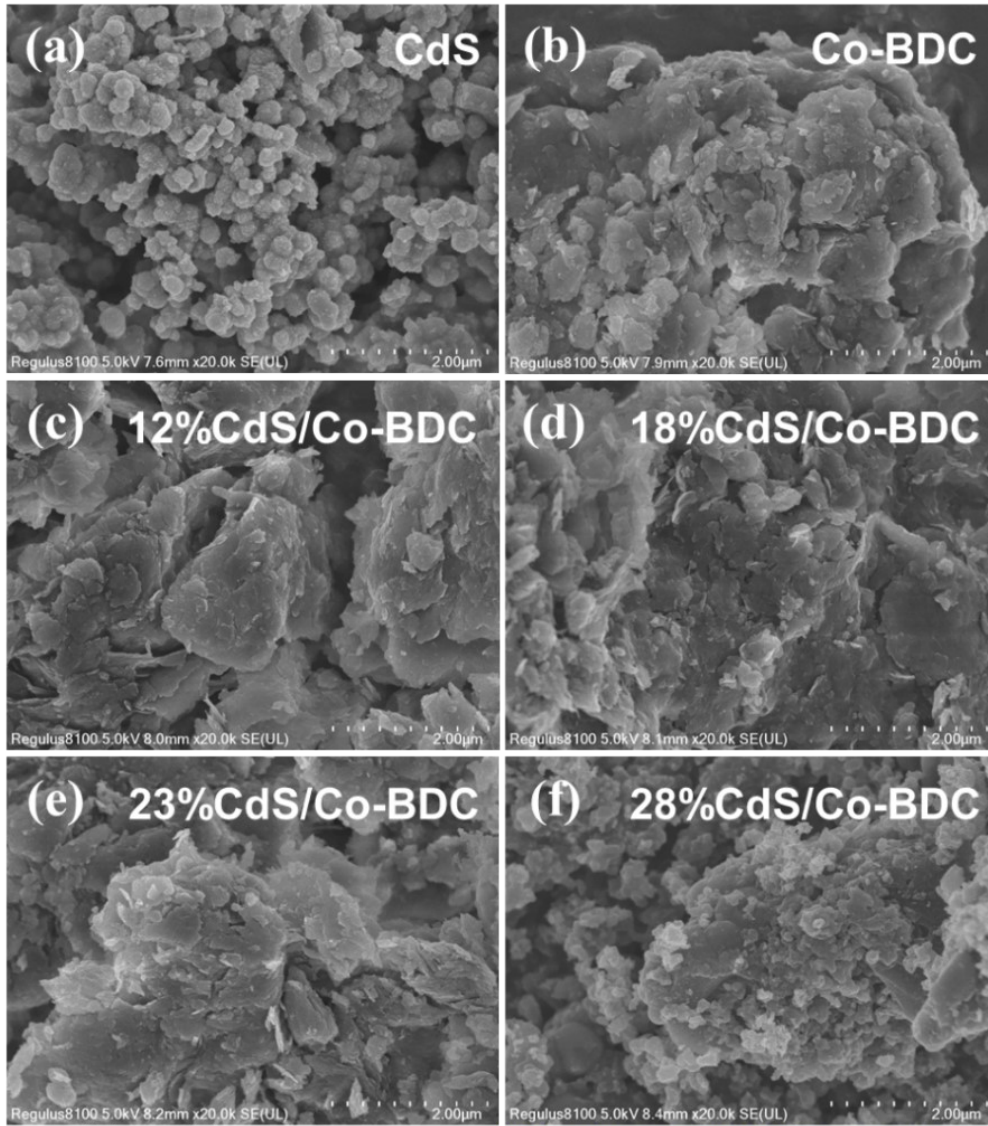

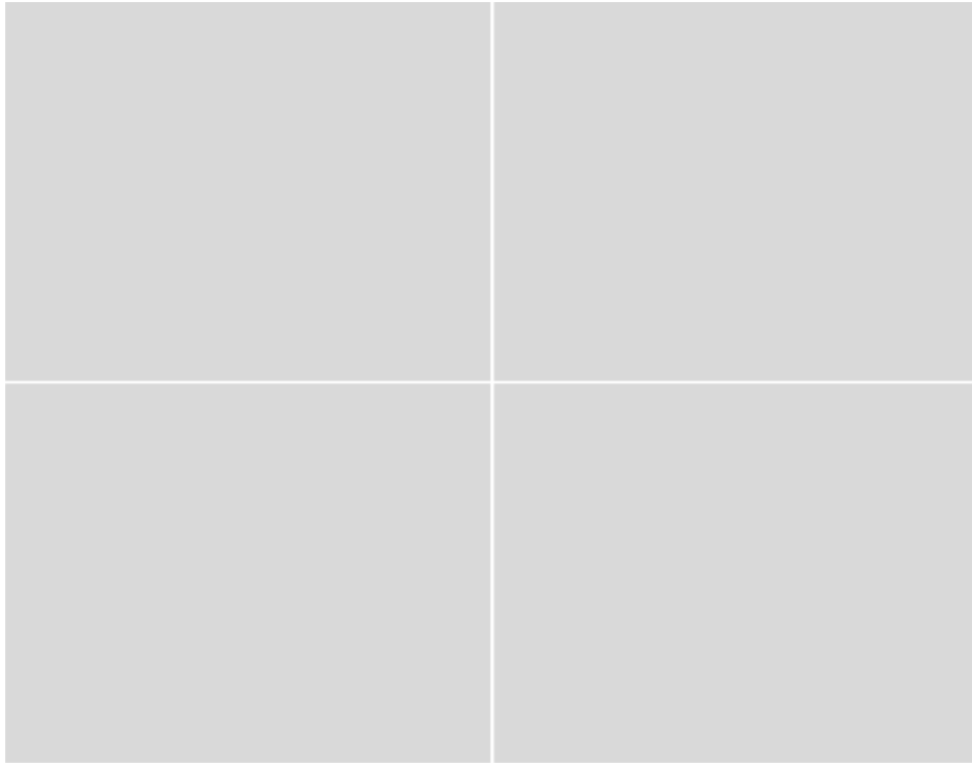

**Fig. S1. SEM images of CdS (a); Co-BDC (b); 12% CdS/Co-BDC (c); 18% CdS/Co-BDC (d); 23% CdS/Co-BDC (e); 28% CdS/Co-BDC(f); 18% CdS/Co-BDC composite (g-j).**

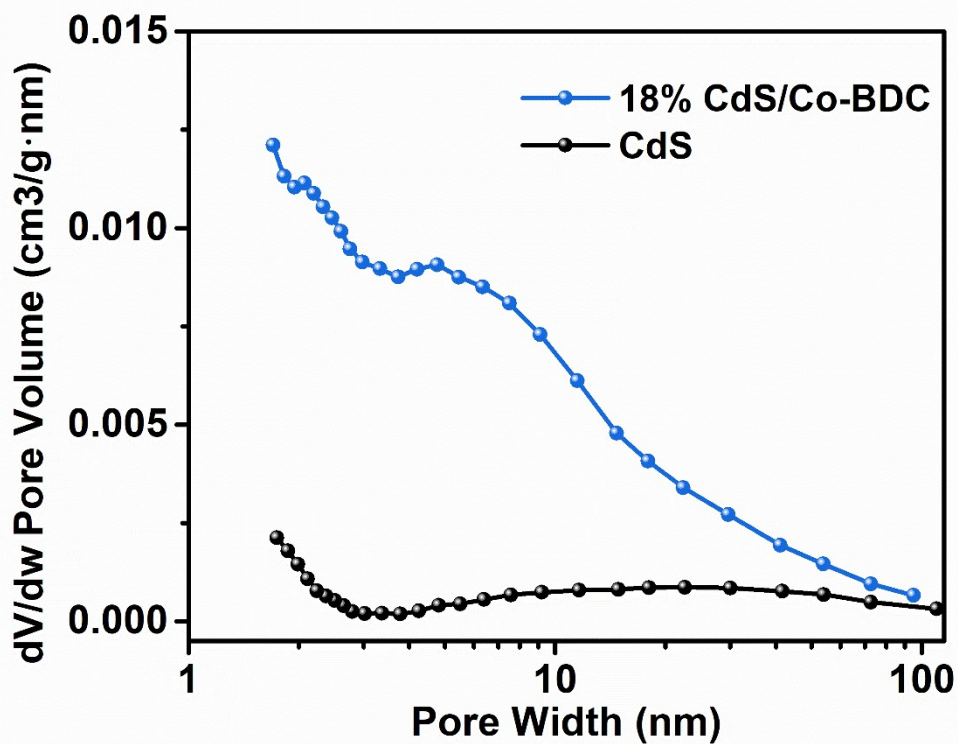

Fig. S2. N<sub>2</sub> The pore size distributions of CdS, Co-BDC and 18% CdS/Co-BDC composite.

Table S1 Specific surface area and pore structure parameters of materials

| Sample         | $S_{BET}$<br>( $m^2 \cdot g^{-1}$ ) | Pore size<br>(nm) | Pore volume<br>( $cm^3 \cdot g^{-1}$ ) |
|----------------|-------------------------------------|-------------------|----------------------------------------|
| CdS            | 17.39                               | 14.71             | 0.05                                   |
| 18% CdS/Co-BDC | 57.42                               | 9.94              | 0.19                                   |

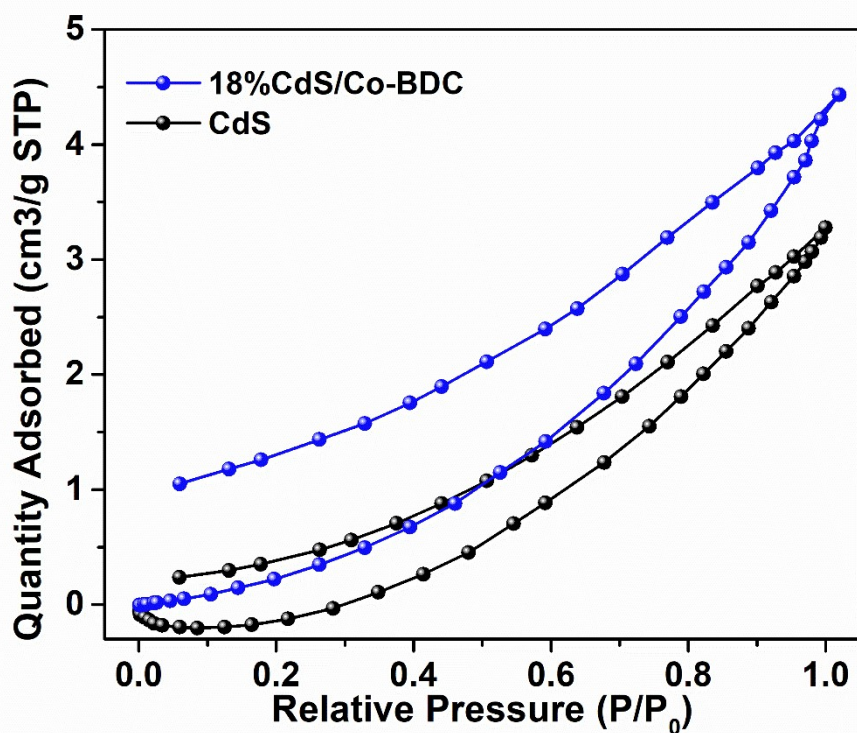

Fig. S3. CO<sub>2</sub> adsorption curve of CdS, Co-BDC and 18% CdS/Co-BDC composite at 298 K.

Table S2 CO<sub>2</sub> adsorption-desorption isotherms of CdS, Co-BDC and 18% CdS/Co-BDC composite

| Sample        | CO-production<br>( $\mu\text{mmol}\cdot\text{g}^{-1}\cdot\text{h}^{-1}$ ) | CO <sub>2</sub> -quantity<br>absorbed<br>( $\text{cm}^3\cdot\text{g}^{-1}$ ) | CO-production/CO <sub>2</sub> -<br>quantity absorbed<br>( $\mu\text{mmol}\cdot\text{cm}^{-3}\cdot\text{h}^{-1}$ ) |
|---------------|---------------------------------------------------------------------------|------------------------------------------------------------------------------|-------------------------------------------------------------------------------------------------------------------|
| CdS           | 2.2                                                                       | 3.28                                                                         | 0.67                                                                                                              |
| 18%CdS/Co-BDC | 19.6                                                                      | 4.43                                                                         | 4.42                                                                                                              |

Table S3 The fitted Rct values of Co-BDC, CdS and 18% CdS/Co-BDC composite

| Sample         | Rp ( $\Omega$ ) |
|----------------|-----------------|
| CdS            | 1006            |
| Co-BDC         | 1012            |
| 18% CdS/Co-BDC | 735.5           |

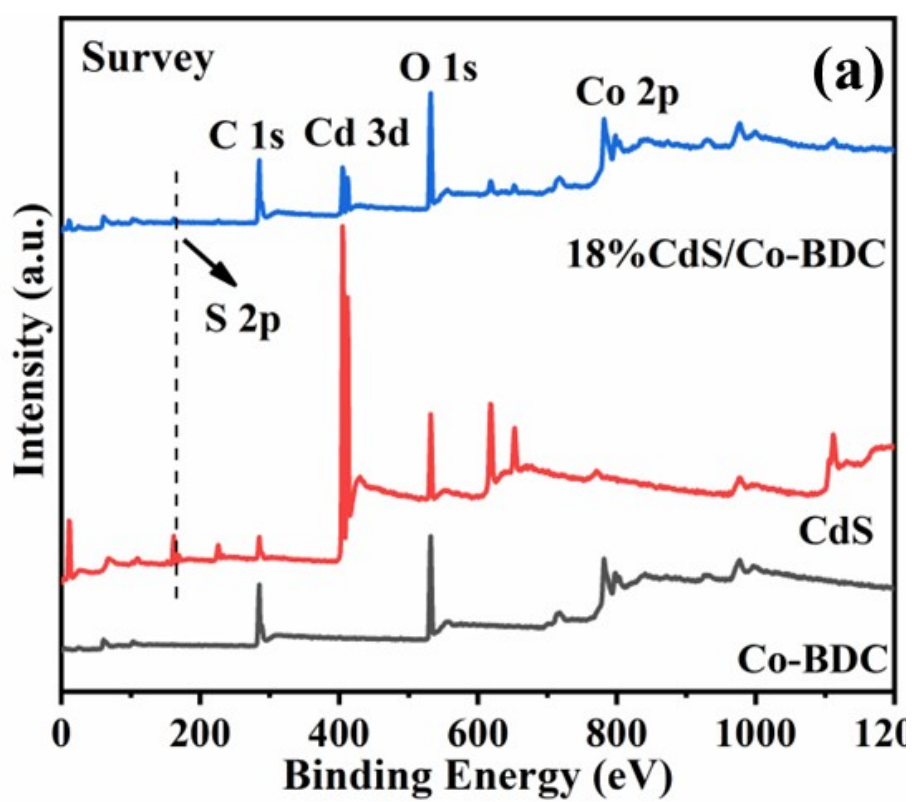

Fig. S4. XPS spectra of survey scan of CdS, Co-BDC and 18% CdS/Co-BDC.

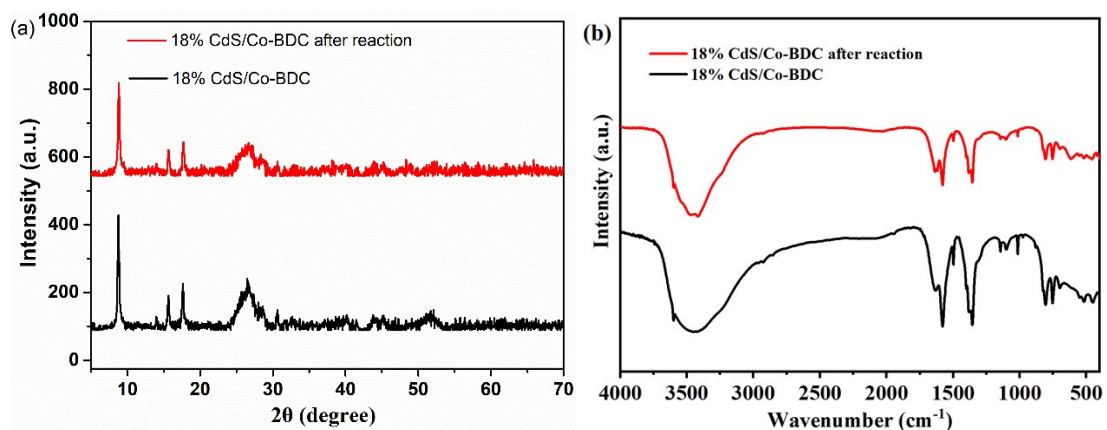

**Fig. S5 XRD and FT-IR pattern of fresh and used 18%CdS/Co-BDC nanocomposites.**

**Fig. S5 XRD and FT-IR pattern of fresh and used 25-Bi<sub>2</sub>O<sub>2</sub>Se/BiOCl nanocomposites.**

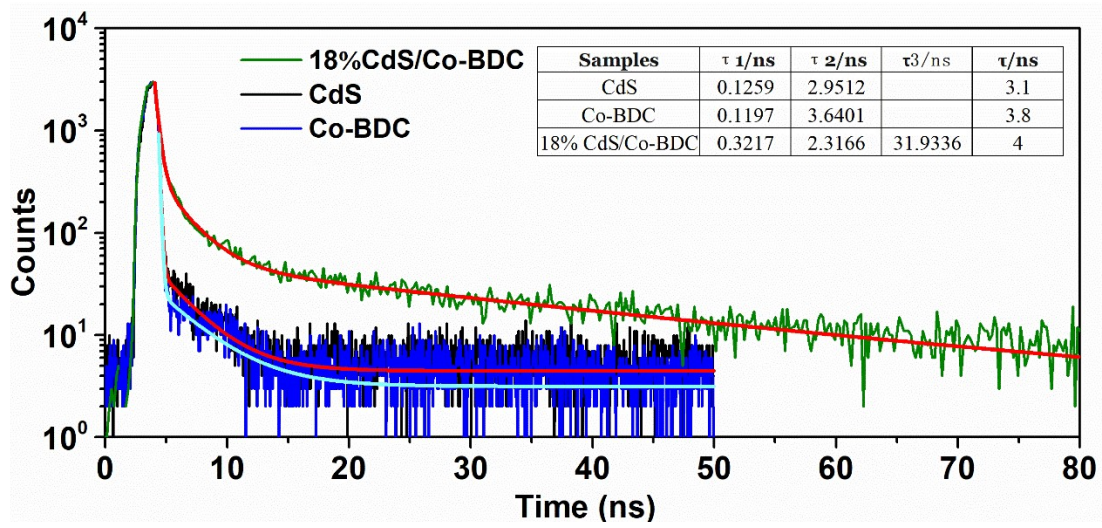

Fig. S6. Time-resolved PL spectra of bare CdS, Co-BDC and 18% CdS/Co-BDC.

Table S4. Analyses of the time-resolved transient PL decay spectra of the samples.

| Samples        | $\tau_1/\text{ns}$ | B1      | $\tau_2/\text{ns}$ | B2     | $\tau_3/\text{ns}$ | B3   | $\tau/\text{ns}$ |
|----------------|--------------------|---------|--------------------|--------|--------------------|------|------------------|
| CdS            | 0.1259             | 1278.42 | 2.9512             | 38.49  |                    |      | 3.13             |
| Co-BDC         | 0.1197             | 1349.10 | 3.6401             | 23.40  |                    |      | 3.86             |
| 18% CdS/Co-BDC | 0.3217             | 4703.53 | 2.3166             | 354.08 | 31.9336            | 0.98 | 4.0              |
